# Supplementary material for: RNAsnp: Efficient Detection of Local RNA Secondary Structure Changes Induced by SNPs
Source: PubMed Central journal article supplement (PMC3708107; doi:10.1002/humu.22273), 2013-01-11
Supplement: humu0034-0546-SD1.pdf [file humu0034-0546-SD1.pdf]

## **Supplementary Materials**

**RNA<sub>snp</sub>**: Efficient detection of local RNA secondary structure changes induced by SNPs

Radhakrishnan Sabarinathan, Hakim Tafer, Stefan E. Seemann,  
Ivo L. Hofacker, Peter F. Stadler and Jan Gorodkin

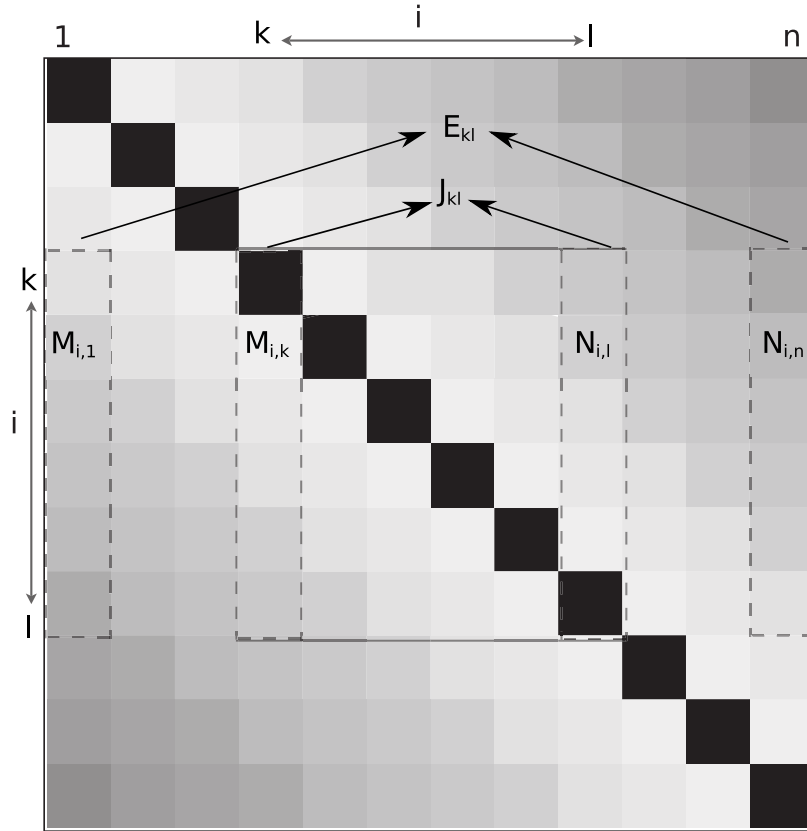

**Figure S1** - The graphical representation illustrates the base pairing probability matrix of a sequence. Each cell  $[i,j]$  contains the base pairing probability of  $i$  with  $j$ , i.e.  $P_{ij}$ . We employed a recursive method to add all the probabilities along the row, which helps for the faster computation of position-wise pairing probabilities ( $\pi$ ). Consider  $[k,l]$  is a sequence interval  $k < i < l$ , and denotes  $M_{i,k}$  and  $N_{i,l}$  the probabilities that  $i$  has a pairing partner in the interval  $[k, i - 1]$  and the interval  $[i + 1, l]$ , resp. These auxiliary variables satisfy  $M_{i,k} = M_{i,k-1} + P_{ki}$  and  $N_{i,l} = N_{i,l+1} + P_{il}$ . Obviously, for all  $k < i < l$  we have  $\pi_i[k, l] = M_{i,k} + N_{i,l}$ . Also, we can directly compute the expected number of base pairs inside and outside the substructure,  $J_{kl}$  and  $E_{kl}$ , resp.

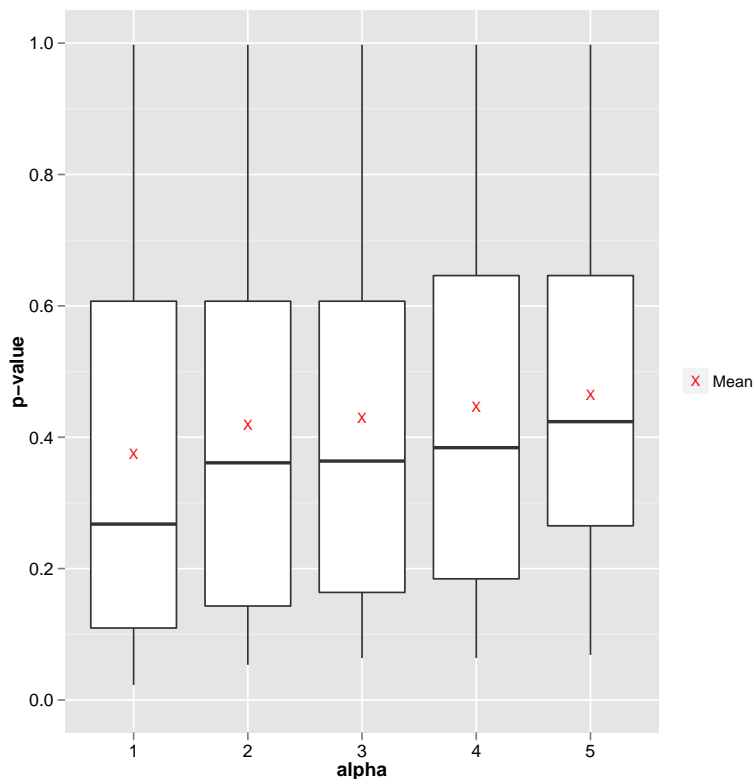

**Figure S2** - The data set of 30 SNPs with reported structural effects was used to test the effect of different  $\alpha$  values ranging from 1 to 5 in steps of 1. The  $\alpha$  parameter determines the ratio between the expected number of base pairs inside ( $J_{k,l}$ ) a local interval  $[k, l]$ , compared to the expected numbers of base pairs ( $E_{k,l}$ ) cross the boundaries of the interval. The box plot shows the distribution of p-values for the 30 known SNPs changes for the different  $\alpha$  values. As expected, the increase in mean  $p$ -value correlate with increase in the  $\alpha$  value, because the higher the alpha value the greater the increase in expected number of base pairs inside the  $[k, l]$  compare to the outside. This eventually results in the selection of larger interval  $[k, l]$  for comparison and thus the measure of local structural effect become less significance. Thus, the  $\alpha=1$  is chosen as default.

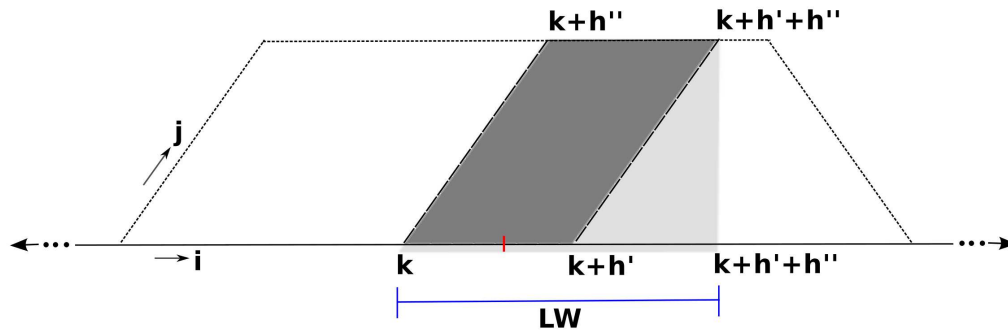

**Figure S3** - Schematic representation of RNAplfold base pairing probability matrix calculated for a window of 400 nts centering the SNP position. The region highlighted in dark gray is used for the initial screen to find the position  $k$  that maximizes  $d_{(k)}^2(P, P^*)$ . The local window (LW) ranges from  $k$  to  $k + h' + h''$ , where  $h' = 20$  and  $h'' = 120$ . The LW contains the interval  $[u, v]$  from which the optimized distance measure ( $d^\#$ ) is obtained.

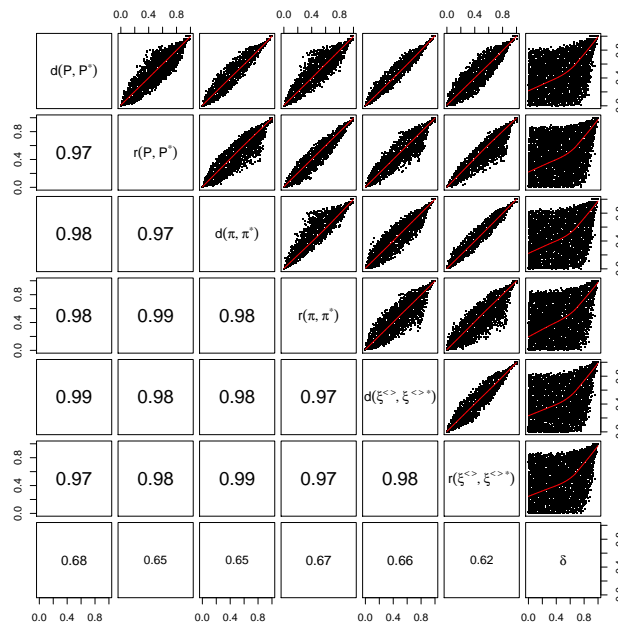

**Figure S4** - The correlation between global(dis)similarity measures was computed using the data set of 7000 random sequences of length 400 and considered SNPs at 200 position. The measures distance( $d$ ) and correlation coefficient( $r$ ) computed on various base pairing probabilities ( $P$  - full base pairing probabilities,  $\pi$  - position-wise pairing probabilities,  $\xi^{<>}$  - position-wise, distinguished up- and down-stream pairing probabilities), correlate with each other. However, these measures does not correlate well with the Euclidean distance ( $\delta$ ) computed between the distribution of wild-type and mutant structures.

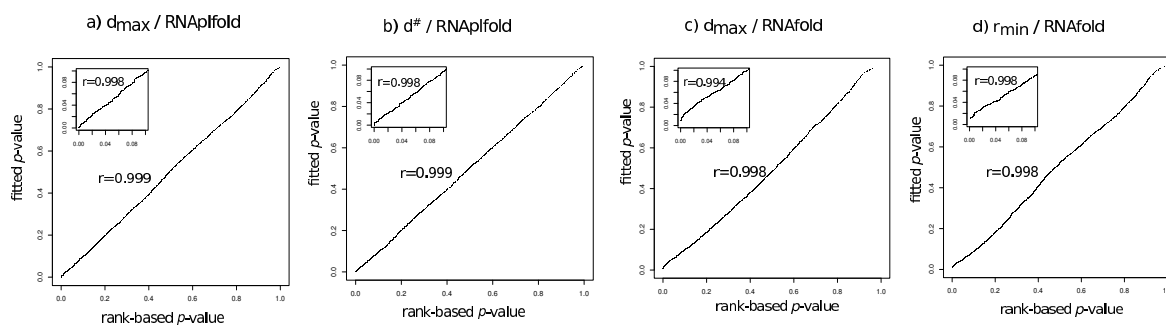

**Figure S5** - Comparison of rank-based  $p$ -values and fitted  $p$ -values for a set of 5000 random numbers. The  $p$ -values are calculated from the background distribution of length 400nts, G+C content between 50 and 60% and the SNP position at 200 position. In all four cases, the comparison of rank-based  $p$ -value versus the fitted  $p$ -value shows high correlation ( $r > 0.9$ ). The inset figure shows the comparison of  $p$ -values which are less than 0.1.

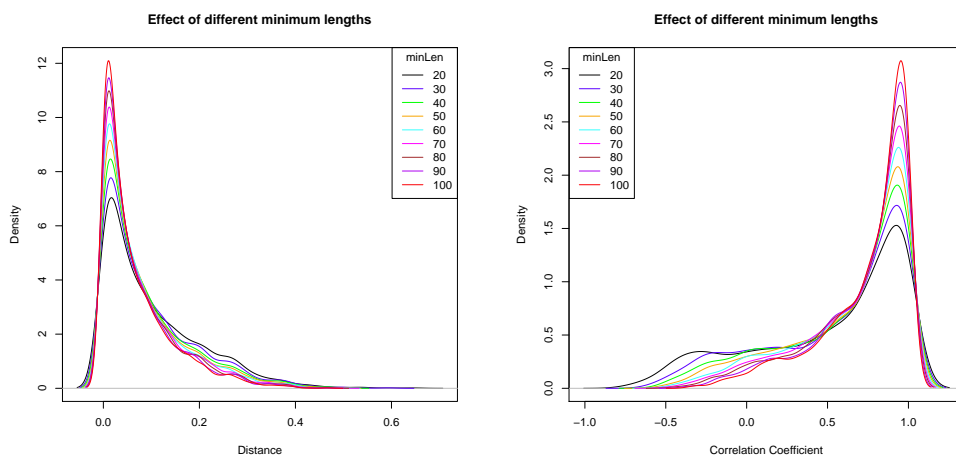

**Figure S6** - The effect of minimum length on  $d_{max}/RNAfold$  and  $r_{min}/RNAfold$  was tested with different cut-off values. In both cases, the length cut-off 50 shows the unimodal distribution.

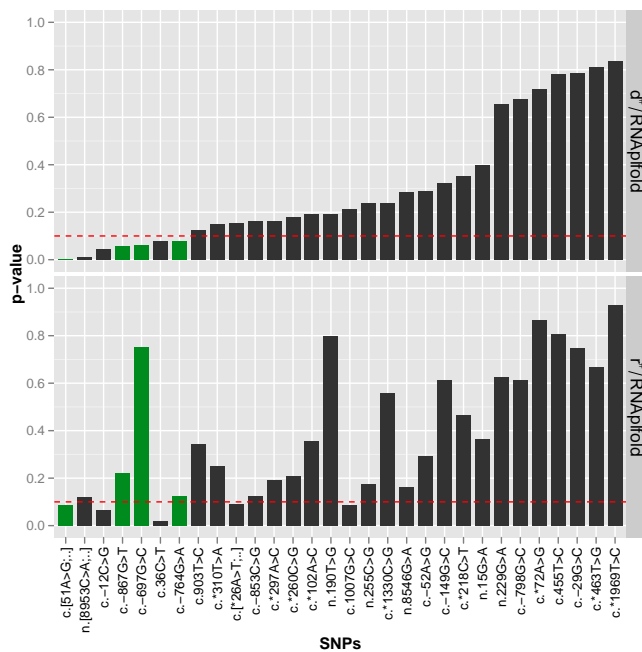

**Figure S7** - The significance of structural effects as predicted by  $d^{\#}/\text{RNAplfold}$  and  $r^{\#}/\text{RNAplfold}$  for the 30 known SNPs. The p-values are shown as bars and the red dashed line represents the selected threshold value 0.1. The four experimentally validated examples are indicated in green. The SNPs were described according to HGVS nomenclature.

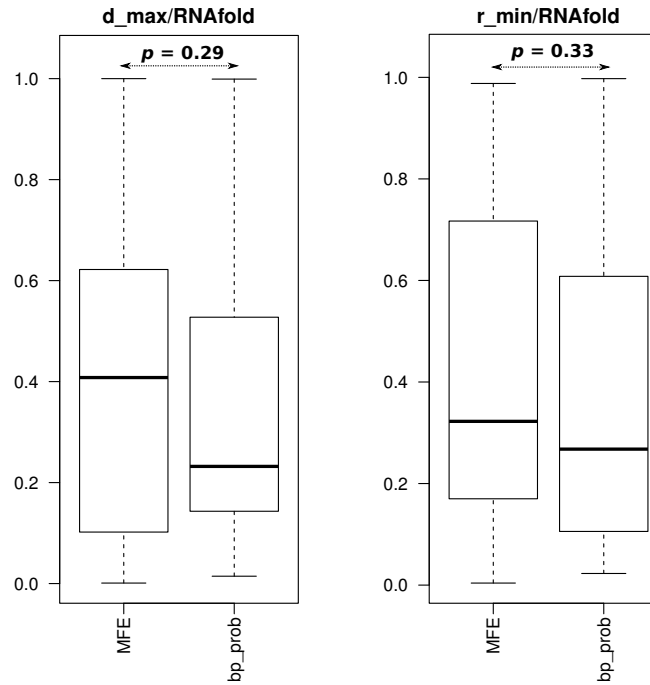

**Figure S8** - The data set of 30 SNPs with reported structural effects was used to compare the local measures  $d_{max}$  and  $r_{min}$  based on base pairing probability of structural ensemble and the base pairs of minimum free energy (MFE) structure, which was calculated using RNAfold. The box plot shows the distribution of  $p$ -values for the 30 known SNPs obtained for the two measures. The  $p$ -values from the local measures based on the structural ensemble are in general smaller than the  $p$ -values derived from the MFE structure. The comparison of two  $p$ -value distributions using Wilcoxon rank sum test, however, shows no significant difference ( $P > 0.2$ ) for either of the  $d_{max}$  or  $r_{min}$  measures. This may be explained by the fact that the available data set SNPs are small.

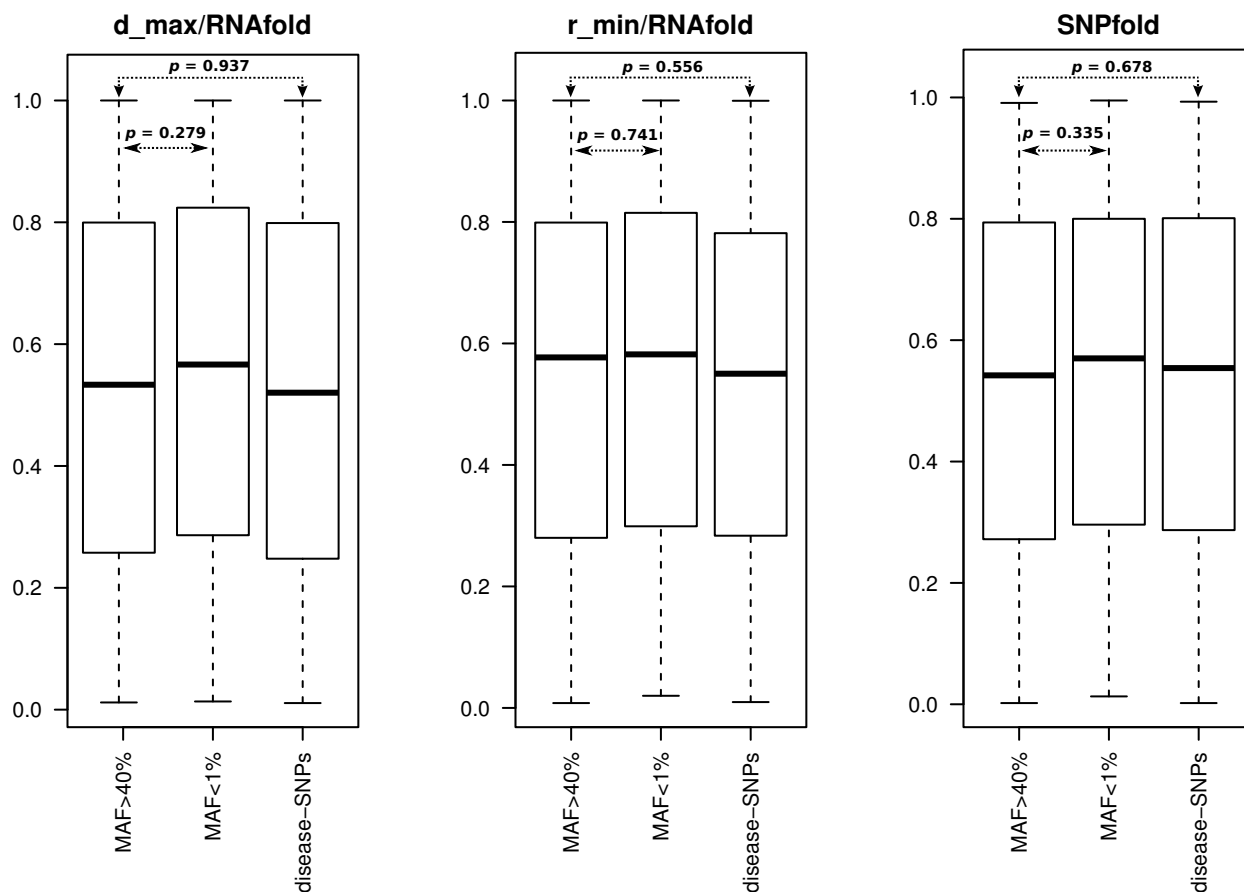

**Figure S9** - The box plots show the distribution of  $p$ -values calculated for three different data sets that are equal in number of SNPs ( $n=501$ ) obtained from a) HapMap database with minor allele frequency greater than 40%, b) dbSNP (build 135) with minor allele frequency less than 1% and c) disease-associated SNPs from Human Gene mutation Database (HDMD). The structural effect of these SNPs were predicted with RNA<sub>snp</sub> (Mode 1) and SNPfold [Halvorsen et al., 2010]. For each structural (dis)similarity measure, the difference between the  $p$ -value distribution of the three data sets were compared using Wilcoxon rank sum test. It shows that P-value of the wilcoxon rank sum test are higher than the significant level of 0.01 and suggests that there is no significant difference between the  $p$ -value distributions of three different SNP data sets. The same scenario was observed in the case of global measure, SNPfold.



**Table S1** - An overview of 30 SNPs with reported structural effect on RNA secondary structure. The SNPs were described according to HGVS nomenclature.

| Disease/Phenotype                                                   | Gene   | Refseq         | SNP                                   | Validation   | Reference |
|---------------------------------------------------------------------|--------|----------------|---------------------------------------|--------------|-----------|
| Alteration of RNA replication in HCV                                | NS5B   | AJ238799.1     | n.[8953C>A;8955T>G]                   | experimental | [1]       |
| Tumor formation                                                     | p53    | NM_001126114.2 | c.[51A>G;54A>C;57T>C]                 | experimental | [2]       |
| HIV-1 resistance against RNAi                                       | Nef    | K02013.1       | n.8546G>A                             | experimental | [3]       |
| Alteration of alanyl tRNA synthetase expression in human            | AARS   | D32050.1       | c.903T>C                              | experimental | [4]       |
| Cowden Syndrome                                                     | PTEN   | NM_000314.4    | c.-867G>T                             | predicted    | [5]       |
|                                                                     |        |                | c.-853C>G                             | predicted    |           |
|                                                                     |        |                | c.-798G>C                             | predicted    |           |
|                                                                     |        |                | c.-764G>A                             | predicted    |           |
| Occult-hepatitis B virus infection                                  | -      | EU155893.1     | n.190T>G                              | predicted    | [6]       |
| Psychiatric disorders                                               | TPH2   | NM_173353.3    | c.-52A>G                              | predicted    | [7]       |
| Diurnal preference                                                  | PER2   | NM_022817.2    | c.-12C>G                              | predicted    | [8]       |
| Nasopharyngeal Carcinoma Risk                                       | TLR4   | NM_138554.4    | c.1007G>C                             | predicted    | [9]       |
| Alteration in localization of rat MT1 mRNA                          | MT1    | NM_138826.4    | c.[*26A>T;*27G>C;28G>C;*29T>A;*30G>C] | predicted    | [10]      |
| Cone Dystrophy                                                      | PDE6H  | NM_006205.2    | c.-29G>C                              | predicted    | [11]      |
| Congenital heart disease                                            | GATA4  | NM_002052.3    | c.*260C>G                             | predicted    | [12]      |
|                                                                     |        |                | c.*218C>T                             | predicted    |           |
| Antipsychotic induced weight gain                                   | HTR2C  | NM_000868.2    | c.-697G>C                             | predicted    | [13]      |
| Muscular dystrophies                                                | SGCG   | U34976.1       | c.*102A>C                             | predicted    | [14]      |
| Pain sensitivity<br>Alteration of plasma zymogen TAFI concentration | COMT   | NM_007310.2    | c.36C>T                               | predicted    | [15]      |
|                                                                     | CPB2   | NM_001872.3    | c.*310T>A                             | predicted    | [16]      |
| Anauxetic dysplasia                                                 | RMRP   | NR_003051.3    | n.255C>G                              | predicted    | [17]      |
|                                                                     |        |                | n.15G>A                               | predicted    |           |
| Mental retardation                                                  | CDK5R1 | NM_003885.2    | c.*1330C>G                            | predicted    | [18]      |
| Alteration of RNA translation in HCV-1b                             | IRES   | EU857431.1     | n.229G>A                              | predicted    | [19]      |
| Hyperferritinaemia cataract syndrome                                | FTL    | NM_000146.3    | c.-149G>C                             | predicted    | [20]      |
| Resistance to                                                       |        |                |                                       |              |           |
| Hirschsprung disease                                                | RET    | NM_020975.4    | c.*1969T>C                            | predicted    | [21]      |
| Ischemic Cardiomyopathy                                             | ADORA1 | NM_000674.2    | c.*297A>C                             | predicted    | [22]      |
| Neuropsychiatric disorders                                          | SLC6A4 | NM_001045.4    | c.*463T>G                             | predicted    | [23]      |
| Cutaneous melanoma                                                  | BMP4   | NM_001202.3    | c.455T>C                              | predicted    | [24]      |

## Results of Rchange analysis

In contrast to the RNA mutation analysis programs (like **RNAsnp**) based on base pairing probability, the program **Rchange** [Kiryu and Asai , 2012] was recently developed to predict the structural effect based on the changes in the energy of RNA secondary structures in response to the single or double mutations. This program was tested on our data set of four known SNPs whose structural effect has been experimentally verified. Since, the program can handle either single or double mutants, only three out of the four known SNPs were tested successfully. **Rchange** computed the changes in thermodynamic entropy ( $S$ ), mean energy ( $U$ ) and ensemble free energy ( $F$ ) between the wild-type and mutant RNA secondary structures. In order to compute the significance value, the RNA sequence of each SNP was shuffled ten times and subjected each of them with **Rchange** to compute the energy difference for the random mutations. Using this result as background distribution, the p-value is estimated using a non-parametric approach for the results of known SNPs (Table S2). Table S2 shows that the **RNAsnp** predicted only one SNP (n.8546G>A) have high structural effect based on the  $dS/S$  and  $dF/|F|$  measures.

**Table S2** - The results of **Rchange** for the three out of four SNPs with reported structural effect. The measures  $dS/S$ ,  $dU/|U|$  and  $dF/|F|$  represents, respectively, the difference in the thermodynamic entropy of RNA secondary structures, mean energy and ensemble free energy between the wild-type and mutant RNAs. The  $p$ -value with less than 0.1 significance level are highlighted with bold text.

| Ref | Gene | Accession  | SNP                 | Rchange                 |                           |                           | RNA <span>snp</span>                      |                                           |
|-----|------|------------|---------------------|-------------------------|---------------------------|---------------------------|-------------------------------------------|-------------------------------------------|
|     |      |            |                     | $dS/S$<br>( $p$ -value) | $dU/ U $<br>( $p$ -value) | $dF/ F $<br>( $p$ -value) | $d_{max}/\text{RNAfold}$<br>( $p$ -value) | $r_{min}/\text{RNAfold}$<br>( $p$ -value) |
| 1   | NS5B | AJ238799.1 | n.[8953C>A;8955T>G] | 0.911                   | 0.802                     | 0.729                     | <b>0.074</b>                              | 0.121                                     |
| 2   | AARS | D32050.1   | c.903T>C            | 0.327                   | 0.317                     | 0.303                     | <b>0.072</b>                              | <b>0.093</b>                              |
| 3   | Nef  | K02013.1   | n.8546G>A           | <b>0.050</b>            | 0.590                     | <b>0.089</b>              | <b>0.094</b>                              | <b>0.083</b>                              |

**Table S3** - List of disease associated SNPs from HGMD that are predicted to have significant local structural effect ( $p$ -value  $< 0.1$ ) by  $d_{max}/\text{RNAfold}$  or  $r_{min}/\text{RNAfold}$  of **RNA<sub>snp</sub>** (Mode 1). The SNPs were described according to HGVS nomenclature.

| Disease/phenotype                     | Gene     | HGMD<br>Accession | Genbank<br>Accession | SNP        | $p$ -value               |                          |
|---------------------------------------|----------|-------------------|----------------------|------------|--------------------------|--------------------------|
|                                       |          |                   |                      |            | $d_{max}/\text{RNAfold}$ | $r_{min}/\text{RNAfold}$ |
| Pseudohypoaldosteronism               | NR3C2    | CR030126          | NM_000901.4          | c.-2C>G    | <b>0.017</b>             | <b>0.022</b>             |
| Hypertension                          | EDN2     | CR994679          | NM_001956.3          | c.*390G>A  | <b>0.036</b>             | <b>0.021</b>             |
| Obesity                               | CNR1     | CR073542          | NM_033181.3          | c.*2394A>G | <b>0.032</b>             | <b>0.036</b>             |
| Myocardial infarction                 | GP1BA    | CR022116          | NM_000173.5          | c.-5T>C    | <b>0.040</b>             | <b>0.037</b>             |
| Colorectal cancer                     | INSR     | CR082021          | NM_001079817.1       | c.*104A>G  | <b>0.042</b>             | <b>0.030</b>             |
| Graves' disease                       | FCRL3    | CR067134          | NM_052939.3          | c.-11G>C   | <b>0.011</b>             | <b>0.042</b>             |
| Increased triglyceride levels         | ABCA1    | CR025352          | NM_005502.3          | c.-279C>G  | <b>0.044</b>             | <b>0.022</b>             |
| Insulin resistance hypertension       | RETN     | CR032443          | NM_020415.3          | c.*62G>A   | <b>0.045</b>             | <b>0.043</b>             |
| Cartilage-Hair hypoplasia             | RMRP     | CR063417          | NR_003051.3          | n.215A>G   | <b>0.048</b>             | <b>0.027</b>             |
| Hypercholesterolaemia                 | LDLR     | CR971948          | NM_000527.4          | c.-14C>A   | <b>0.025</b>             | <b>0.048</b>             |
| Glaucoma                              | CYP1B1   | CR032431          | NM_000104.3          | c.-286C>T  | <b>0.063</b>             | <b>0.036</b>             |
| Reduced transcriptional activity      | NR3C1    | CR016150          | NM_001024094.1       | c.-219C>A  | <b>0.044</b>             | <b>0.063</b>             |
| HDL cholesterol levels                | LIPG     | CR032437          | NM_006033.2          | c.*482A>G  | <b>0.051</b>             | <b>0.065</b>             |
| Factor VII deficiency                 | F7       | CR090334          | NM_019616.2          | c.-44T>C   | <b>0.066</b>             | <b>0.042</b>             |
| HaemophiliaA                          | F8       | CR070421          | NM_000132.3          | c.-112G>A  | <b>0.074</b>             | <b>0.010</b>             |
| Cartilage-Hair hypoplasia             | RMRP     | CR064472          | NR_003051.3          | n.10T>C    | <b>0.076</b>             | <b>0.024</b>             |
| VonHippel-Lindau syndrome             | VHL      | CR011856          | NM_000551.3          | c.*7C>G    | <b>0.076</b>             | <b>0.065</b>             |
| Obesity                               | SLC6A14  | CR035766          | NM_007231.3          | c.*178C>G  | <b>0.078</b>             | <b>0.062</b>             |
| Spasticparaplegia31                   | REEP1    | CR082030          | NM_022912.2          | c.*14C>T   | <b>0.033</b>             | <b>0.081</b>             |
| Hyperferritinaemia-cataract syndrome  | FTL      | CR061334          | NM_000146.3          | c.-178T>G  | <b>0.052</b>             | <b>0.097</b>             |
| Severe iron overload                  | ALAS2    | CR090059          | NM_001037968.3       | c.-69C>T   | <b>0.078</b>             | 0.390                    |
| Systemic lupus erythematosus          | CRP      | CR040151          | NM_000567.2          | c.*1082G>A | <b>0.048</b>             | 0.316                    |
| Migraine                              | EDNRA    | CR011854          | NM_001957.3          | c.-67G>A   | <b>0.053</b>             | 0.106                    |
| Hyperferritinaemia-cataract syndrome  | FTL      | HR030029          | NM_000146.3          | c.-171C>G  | <b>0.100</b>             | 0.354                    |
| Cholesterol level                     | GHRL     | CR065638          | NR_024132.1          | n.316G>C   | <b>0.056</b>             | 0.110                    |
| Colorectal cancer                     | MLH1     | CR033148          | NM_000249.3          | c.-28A>T   | <b>0.097</b>             | 0.140                    |
| Panencephalitis                       | MX1      | CR040301          | NM_002462.3          | c.-434G>T  | <b>0.058</b>             | 0.258                    |
| Lipoprotein/Triglyceride levels       | PCK1     | CR054265          | NM_002591.3          | c.*431T>C  | <b>0.084</b>             | 0.103                    |
| Cowden disease                        | PTEN     | CR032094          | NM_000314.4          | c.-930G>A  | <b>0.019</b>             | 0.109                    |
| Diabetes                              | PTEN     | CR033149          | NM_000314.4          | c.-8C>G    | <b>0.098</b>             | 0.266                    |
| Chronic obstructive pulmonary disease | SERPINA1 | CR061339          | NM_001127701.1       | c.-458C>T  | <b>0.079</b>             | 0.129                    |
| Haemochromatosis                      | SLC40A1  | CR057017          | NM_014585.5          | c.-187A>G  | <b>0.045</b>             | 0.282                    |

**Table S3** - continued

| Disease/phenotype                          | Gene   | HGMD      | Genbank        | SNP       | <i>p</i> -value          |                          |
|--------------------------------------------|--------|-----------|----------------|-----------|--------------------------|--------------------------|
|                                            |        | Accession | Accession      |           | $d_{max}/\text{RNAfold}$ | $r_{min}/\text{RNAfold}$ |
| Aplastic anaemia                           | TERC   | CR057475  | NR_001566.1    | n.117A>C  | <b>0.035</b>             | 0.223                    |
| Aplastic anaemia                           | TERC   | CR080776  | NR_001566.1    | n.2G>C    | <b>0.082</b>             | 0.198                    |
| Chondrocalcinosis                          | ANKH   | CR057902  | NM_054027.4    | c.-4G>A   | 0.131                    | <b>0.029</b>             |
| Factor XI deficiency                       | F11    | CR064469  | NM_000128.3    | c.-54G>A  | 0.124                    | <b>0.069</b>             |
| Factor VII deficiency                      | F7     | CR002894  | NM_019616.2    | c.-30A>C  | 0.150                    | <b>0.076</b>             |
| IPEX syndrome                              | FOXP3  | CR063404  | NM_001114377.1 | c.-7G>T   | 0.116                    | <b>0.067</b>             |
| Decreased expression                       | GCH1   | CR075245  | NM_000161.2    | c.*243C>T | 0.148                    | <b>0.065</b>             |
| Frontotemporal dementia?                   | GRN    | CR072310  | NM_002087.2    | c.-72G>T  | 0.178                    | <b>0.054</b>             |
| Hypercholesterolaemia                      | LDLR   | CR042574  | NM_000527.4    | c.-153C>T | 0.116                    | <b>0.059</b>             |
| Hypercholesterolaemia                      | LDLR   | CR951555  | NM_000527.4    | c.-138T>C | 0.170                    | <b>0.091</b>             |
| Cellular response to cadmium               | MT2A   | CR066330  | NM_005953.3    | c.-77A>G  | 0.126                    | <b>0.053</b>             |
| Reduced expression                         | NEIL2  | CR085800  | NM_145043.2    | c.-586C>G | 0.126                    | <b>0.091</b>             |
| Schizophrenia                              | NOS1   | CR025919  | NM_000620.4    | c.*276C>T | 0.181                    | <b>0.059</b>             |
| Decr.serum leptin levels<br>in lean indiv. | POMC   | CR035490  | NM_000939.2    | c.*63C>T  | 0.227                    | <b>0.092</b>             |
| Hirschsprung disease                       | RET    | CR951557  | NM_020975.4    | c.-27C>G  | 0.173                    | <b>0.095</b>             |
| Cartilage-Hair hypoplasia                  | RMRP   | CR012677  | NR_003051.3    | n.263G>T  | 0.130                    | <b>0.051</b>             |
|                                            | RMRP   | CR021393  | NR_003051.3    | n.183G>C  | 0.135                    | <b>0.085</b>             |
|                                            | RMRP   | CR021394  | NR_003051.3    | n.212C>G  | 0.182                    | <b>0.067</b>             |
|                                            | RMRP   | CR054268  | NR_003051.3    | n.183G>T  | 0.136                    | <b>0.085</b>             |
|                                            | RMRP   | CR054277  | NR_003051.3    | n.214C>G  | 0.108                    | <b>0.039</b>             |
| Pancreatitis                               | SPINK1 | CR001469  | NM_003122.3    | c.-53C>T  | 0.121                    | <b>0.020</b>             |
| Nasopharyngeal cancer                      | TLR4   | CR068105  | NR_024168.1    | n.3938G>C | 0.210                    | <b>0.083</b>             |

**Table S4** - List of disease associated SNPs from GWASdb that are predicted to have significant local structural effect by  $d_{max}/\text{RNAplfold}$  ( $p < 0.4$ ) and  $d_{max}/\text{RNAfold}$  ( $p < 0.1$ ) of **RNA<sub>snp</sub>** (with mode 3). The SNPs were described according to HGVS nomenclature.

| Disease/phenotype                                                                | Ensembl         |     |                | <i>p</i> -value          |                          |
|----------------------------------------------------------------------------------|-----------------|-----|----------------|--------------------------|--------------------------|
|                                                                                  | id              | UTR | dbSNP          | $d_{max}/\text{RNAfold}$ | $r_{min}/\text{RNAfold}$ |
| Suicide attempts in bipolar disorder                                             | ENST00000373055 | 3   | rs7822:T>C     | 0.0290                   | 0.0199                   |
| Lapatinib-induced hepatotoxicity                                                 | ENST00000360403 | 5   | rs489676:C>G   | 0.0391                   | 0.0925                   |
| Alzheimer's disease (late onset)                                                 | ENST00000368485 | 3   | rs7514452:C>T  | 0.1847                   | 0.0984                   |
| Multiple complex diseases                                                        | ENST00000368476 | 3   | rs11264221:C>T | 0.1611                   | 0.0356                   |
| Ischemic stroke;Stroke                                                           | ENST00000329117 | 3   | rs11360:A>G    | 0.0594                   | 0.0514                   |
| Systemic lupus erythematosus                                                     | ENST00000255030 | 3   | rs1205:G>A     | 0.2241                   | 0.0477                   |
| Suicide attempts in bipolar disorder                                             | ENST00000333360 | 3   | rs5357:T>C     | 0.0896                   | 0.0296                   |
| Alcohol dependence                                                               | ENST00000319387 | 3   | rs4233175:A>G  | 0.3642                   | 0.0883                   |
| Sudden cardiac arrest                                                            | ENST00000260585 | 3   | rs3820937:G>C  | 0.2935                   | 0.0826                   |
| GWAS of height-adjusted highest forced expiratory volume in a British population | ENST00000379066 | 3   | rs1056021:T>C  | 0.0021                   | 0.0074                   |
| Urinary metabolites                                                              | ENST00000426016 | 3   | rs6704656:T>A  | 0.2238                   | 0.0903                   |
| Amyotrophic Lateral Sclerosis (ALS)                                              | ENST00000306448 | 5   | rs896210:C>T   | 0.0394                   | 0.0739                   |
| Multiple complex diseases                                                        | ENST00000306503 | 3   | rs17823065:T>C | 0.0364                   | 0.0249                   |
| Parkinson's disease; Multiple complex diseases                                   | ENST00000254630 | 3   | rs11395:T>C    | 0.3539                   | 0.0370                   |
| Urinary metabolites                                                              | ENST00000259213 | 3   | rs4849142:C>T  | 0.0335                   | 0.0690                   |
| Parkinson's disease                                                              | ENST00000338983 | 3   | rs8446:T>C     | 0.0482                   | 0.0939                   |
| Multiple complex diseases                                                        | ENST00000443029 | 5   | rs2290536:T>G  | 0.3384                   | 0.0222                   |
| Urinary metabolites                                                              | ENST00000357632 | 3   | rs17765088:C>G | 0.0043                   | 0.0108                   |
| Lung adenocarcinoma                                                              | ENST00000433104 | 3   | rs3172494:C>A  | 0.0015                   | 0.0166                   |
| Serum calcium                                                                    | ENST00000344337 | 3   | rs17201246:G>T | 0.3573                   | 0.0712                   |
| Multiple continuous traits in DGI samples                                        | ENST00000305097 | 3   | rs16864613:C>G | 0.1268                   | 0.0405                   |
| Alzheimer's disease (late onset)                                                 | ENST00000337774 | 3   | rs3821801:A>G  | 0.0123                   | 0.0753                   |
| Serum uric acid;Serum urate                                                      | ENST00000326756 | 3   | rs3217:G>A     | 0.0439                   | 0.0363                   |
| GWAS of systolic blood pressure in a British population                          | ENST00000344157 | 3   | rs2293595:A>G  | 0.1178                   | 0.0504                   |
| Serum uric acid                                                                  | ENST00000237596 | 3   | rs2728121:C>T  | 0.0631                   | 0.0182                   |
| Parkinson's disease                                                              | ENST00000394989 | 3   | rs3857053:G>A  | 0.1326                   | 0.0566                   |
| Alcohol dependence                                                               | ENST00000515683 | 3   | rs2298753:A>G  | 0.0012                   | 0.0072                   |
| Multiple complex diseases                                                        | ENST00000285311 | 3   | rs17509643:C>G | 0.1033                   | 0.0770                   |
| potassium response to spironolactone                                             | ENST00000355292 | 5   | rs2070951:C>G  | 0.0466                   | 0.0167                   |
| Alzheimer's disease (late onset)                                                 | ENST00000061240 | 3   | rs2279723:C>A  | 0.0611                   | 0.0564                   |
| Alzheimer's disease (late onset)                                                 | ENST00000284274 | 3   | rs25952:A>C    | 0.1341                   | 0.0659                   |
| Thrombosis                                                                       | ENST00000356834 | 3   | rs1298:C>T     | 0.0129                   | 0.0907                   |

**Table S4** - continued

| Disease/phenotype                                                      | Ensembl         |     |                | <i>p</i> -value   |                   |
|------------------------------------------------------------------------|-----------------|-----|----------------|-------------------|-------------------|
|                                                                        | id              | UTR | dbSNP          | $d_{max}/RNAfold$ | $r_{min}/RNAfold$ |
| Common traits (Other)                                                  | ENST00000380956 | 3   | rs1050975:G>A  | 0.1541            | 0.0154            |
| Phospholipid levels (plasma)                                           | ENST00000354666 | 3   | rs4532436:G>C  | 0.0171            | 0.0486            |
| Multiple complex diseases                                              | ENST00000383555 | 3   | rs2073149:A>T  | 0.0943            | 0.0114            |
| Lung adenocarcinoma;Rheumatoid Arthritis                               | ENST00000376883 | 5   | rs2535238:G>T  | 0.0419            | 0.0468            |
| Rheumatoid arthritis;Lung cancer                                       | ENST00000449742 | 3   | rs2257914:G>T  | 0.0303            | 0.0103            |
| Rheumatoid Arthritis                                                   | ENST00000375015 | 3   | rs482194:T>C   | 0.0844            | 0.0795            |
| Rheumatoid Arthritis                                                   | ENST00000395388 | 5   | rs14004:C>A    | 0.2745            | 0.0265            |
| Serum metabolites;<br>Multiple complex diseases;<br>Multiple sclerosis | ENST00000395388 | 3   | rs7194:G>A     | 0.3531            | 0.0417            |
| HIV-1 control                                                          | ENST00000374897 | 3   | rs241454:T>C   | 0.1504            | 0.0461            |
| Multiple complex diseases                                              | ENST00000374680 | 3   | rs2744537:T>G  | 0.1538            | 0.0268            |
| Multiple complex diseases                                              | ENST00000482399 | 3   | rs461338:A>G   | 0.1284            | 0.0420            |
| Prostatic Neoplasms;height                                             | ENST00000311565 | 5   | rs2016520:C>T  | 0.2705            | 0.0659            |
| Lipoprotein-associated<br>phospholipase A2 activity and mass           | ENST00000544460 | 3   | rs12528857:C>A | 0.3672            | 0.0645            |
| Attention Deficit Disorder<br>with Hyperactivity                       | ENST00000369838 | 3   | rs1062793:A>G  | 0.0807            | 0.0925            |
| Coronary heart disease;                                                | ENST00000367882 | 3   | rs12190287:C>G | 0.0345            | 0.0622            |
| Bone mineral density (spine)                                           | ENST00000367290 | 3   | rs6932603:T>C  | 0.1815            | 0.0227            |
| Multiple complex diseases                                              | ENST00000222792 | 3   | rs1420145:C>G  | 0.0090            | 0.0138            |
| Aortic root size;Aortic root size                                      | ENST00000360415 | 3   | rs875971:T>C   | 0.2875            | 0.0137            |
| Major depressive disorder                                              | ENST00000005178 | 3   | rs11531570:C>T | 0.3857            | 0.0633            |
| Alzheimer's disease                                                    | ENST00000205402 | 3   | rs4564:G>A     | 0.1477            | 0.0272            |
| Glaucoma (primary open-angle)                                          | ENST00000222693 | 3   | rs1052990:T>G  | 0.0436            | 0.0439            |
| Inflammatory Bowel Diseases                                            | ENST00000466675 | 3   | rs4721:A>C     | 0.0507            | 0.0936            |
| Information processing speed                                           | ENST00000401878 | 3   | rs2007922:G>A  | 0.0018            | 0.0169            |
| Multiple complex diseases                                              | ENST00000256255 | 3   | rs3189926:T>G  | 0.1546            | 0.0134            |
| Multiple continuous traits<br>in DGI samples                           | ENST00000342228 | 3   | rs6841:C>G     | 0.0352            | 0.0934            |
| Suicide attempts in bipolar disorder                                   | ENST00000289957 | 5   | rs4950:G>A     | 0.0926            | 0.0633            |
| Suicide attempts in bipolar disorder                                   | ENST00000521271 | 3   | rs1044730:C>T  | 0.0089            | 0.0812            |
| Amyotrophic Lateral Sclerosis (ALS)                                    | ENST00000297848 | 3   | rs2429:G>T     | 0.1519            | 0.0903            |
| Parkinson's disease                                                    | ENST00000314393 | 3   | rs3802266:A>G  | 0.3048            | 0.0906            |
| Other erythrocyte phenotypes;<br>Multiple complex diseases             | ENST00000381750 | 3   | rs1053872:G>C  | 0.0308            | 0.0516            |
| Parkinson's disease (age of onset)                                     | ENST00000374193 | 3   | rs10817478:A>G | 0.0629            | 0.0215            |
| Proinsulin levels                                                      | ENST00000372155 | 3   | rs306549:G>C   | 0.0282            | 0.0752            |
| Achilles tendinopathy                                                  | ENST00000371817 | 3   | rs12722:C>T    | 0.1740            | 0.0536            |

**Table S4** - continued

| Disease/phenotype                                                                             | Ensembl         |     |                | <i>p</i> -value   |                   |
|-----------------------------------------------------------------------------------------------|-----------------|-----|----------------|-------------------|-------------------|
|                                                                                               | id              | UTR | dbSNP          | $d_{max}/RNAfold$ | $r_{min}/RNAfold$ |
| Multiple complex diseases                                                                     | ENST00000446108 | 3   | rs8463:A>G     | 0.0289            | 0.0987            |
| Cognitive test performance;<br>Hirschsprung's disease                                         | ENST00000355710 | 3   | rs17028:C>T    | 0.0768            | 0.0330            |
| Urinary metabolites                                                                           | ENST00000333254 | 5   | rs41386650:A>G | 0.1587            | 0.0961            |
| Type II Diabetes Mellitus                                                                     | ENST00000396952 | 3   | rs10500609:A>G | 0.0848            | 0.0705            |
| Rheumatoid Arthritis,<br>cyclic citrullinated peptide (CCP) positive                          | ENST00000318950 | 3   | rs360136:C>A   | 0.0226            | 0.0651            |
| Multiple complex diseases                                                                     | ENST00000361905 | 3   | rs16911839:C>G | 0.0188            | 0.0363            |
| Amyloid A Levels                                                                              | ENST00000396253 | 3   | rs12416821:T>C | 0.0472            | 0.0243            |
| Type II Diabetes Mellitus                                                                     | ENST00000327470 | 3   | rs10500938:C>T | 0.3011            | 0.0968            |
| Urinary metabolites                                                                           | ENST00000321505 | 3   | rs7123662:A>T  | 0.0837            | 0.0352            |
| GWAS of log10 serum total<br>immunoglobulin E concentration<br>in a British population        | ENST00000353172 | 3   | rs3824865:A>G  | 0.0716            | 0.0923            |
| Multiple complex diseases                                                                     | ENST00000279441 | 3   | rs470171:C>G   | 0.0841            | 0.0443            |
| Cardiovascular disease risk factors                                                           | ENST00000530849 | 3   | rs1047964:G>C  | 0.1902            | 0.0221            |
| Multiple complex diseases                                                                     | ENST00000357529 | 3   | rs9783460:C>A  | 0.3374            | 0.0609            |
| Alpha-2-Macroglobulin                                                                         | ENST00000318602 | 5   | rs226380:T>G   | 0.0111            | 0.0445            |
| Multiple continuous traits<br>in DGI samples                                                  | ENST00000486433 | 3   | rs2638315:C>G  | 0.0073            | 0.0597            |
| Multiple continuous traits<br>in DGI samples                                                  | ENST00000378485 | 3   | rs17251627:A>G | 0.2998            | 0.0355            |
| Insulin resistance/response                                                                   | ENST00000360185 | 3   | rs7314498:G>A  | 0.0363            | 0.0663            |
| Type 1 diabetes;<br>Multiple complex diseases                                                 | ENST00000550722 | 3   | rs3519:C>T     | 0.2340            | 0.0653            |
| Suicide attempts in bipolar disorder                                                          | ENST00000382298 | 5   | rs17078720:A>G | 0.3550            | 0.0404            |
| Parkinson's disease                                                                           | ENST00000554271 | 3   | rs7560:T>G     | 0.1258            | 0.0516            |
| Multiple complex diseases                                                                     | ENST00000335725 | 3   | rs9488:C>T     | 0.0698            | 0.0283            |
| Breast Neoplasms                                                                              | ENST00000396402 | 3   | rs4646:T>G     | 0.2089            | 0.0501            |
| Smoking behavior;Lung cancer;<br>Chronic obstructive pulmonary<br>disease;Lung adenocarcinoma | ENST00000258886 | 3   | rs1062980:T>C  | 0.0270            | 0.0121            |
| Smoking behavior;                                                                             | ENST00000044462 | 5   | rs3813570:T>C  | 0.0043            | 0.0542            |
| Lung adenocarcinoma                                                                           | ENST00000261751 | 3   | rs1948:T>C     | 0.0888            | 0.0615            |
| Longevity                                                                                     | ENST00000284382 | 3   | rs12914235:A>G | 0.2592            | 0.0202            |
| Insulin-like growth factors                                                                   | ENST00000262302 | 3   | rs1065656:C>G  | 0.0116            | 0.0687            |
| Insulin resistance/response                                                                   | ENST00000318282 | 3   | rs30126:C>T    | 0.1501            | 0.0382            |
| Multiple complex diseases                                                                     | ENST00000540146 | 3   | rs1054028:T>C  | 0.0105            | 0.0231            |
| Hemoglobin A, Glycosylated                                                                    | ENST00000324015 | 3   | rs1057355:G>T  | 0.1312            | 0.0889            |
| Allergic rhinitis                                                                             | ENST00000322957 | 3   | rs3192453:G>C  | 0.2871            | 0.0622            |
| Myopia (pathological)                                                                         | ENST00000306329 | 3   | rs3744975:C>T  | 0.0033            | 0.0194            |

**Table S4** - continued

| Disease/phenotype                                   | Ensembl         |     |                | <i>p</i> -value          |                          |
|-----------------------------------------------------|-----------------|-----|----------------|--------------------------|--------------------------|
|                                                     | id              | UTR | dbSNP          | $d_{max}/\text{RNAfold}$ | $r_{min}/\text{RNAfold}$ |
| Bladder cancer                                      | ENST00000436407 | 5   | rs10432193:T>C | 0.0618                   | 0.0533                   |
| Multiple continuous traits in DGI samples           | ENST00000334889 | 3   | rs9947104:T>C  | 0.0199                   | 0.0908                   |
| Gallstone disease                                   | ENST00000251047 | 3   | rs1043334:A>C  | 0.2259                   | 0.0403                   |
| Alcohol dependence                                  | ENST00000302850 | 3   | rs1864193:G>T  | 0.1657                   | 0.0978                   |
| Suicide attempts in bipolar disorder                | ENST00000222249 | 3   | rs1057261:A>G  | 0.1008                   | 0.0751                   |
| Urinary Tract Infections; Vesico-Ureteral Reflux    | ENST00000243578 | 3   | rs1800468:G>A  | 0.1071                   | 0.0814                   |
| Alcohol dependence;                                 | ENST00000300843 | 3   | rs344797:T>G   | 0.0037                   | 0.0745                   |
| Multiple continuous traits in DGI samples           | ENST00000262919 | 3   | rs432647:T>C   | 0.1697                   | 0.0284                   |
| Suicide attempts in bipolar disorder                | ENST00000246006 | 3   | rs7492:T>C     | 0.0380                   | 0.0311                   |
| Plasma levels of Protein C                          | ENST00000246186 | 3   | rs6060341:A>G  | 0.3550                   | 0.0963                   |
| Parkinson's disease;                                | ENST00000244061 | 3   | rs6125829:G>T  | 0.0446                   | 0.0674                   |
| GWAS of bipolar disorder in the Japanese population | ENST00000284987 | 3   | rs229070:C>G   | 0.3589                   | 0.0856                   |



## References

- [1] You S, Stump DD, Branch AD, Rice CM. 2004. A *cis*-acting replication element in the sequence encoding the NS5B RNA-dependent RNA polymerase is required for hepatitis C virus RNA replication. *J Virol* 78:1352-1366.
- [2] Grover R, Sharathchandra A, Ponnuswamy A, Khan D, Das S. 2011. Effect of mutations on the p53 IRES RNA structure: Implications for de-regulation of the synthesis of p53 isoforms. *RNA Biol* 8:132-142.
- [3] Westerhout EM, Ooms M, Vink M, Das AT, Berkhout B. 2005. HIV-1 can escape from RNA interference by evolving an alternative structure in its RNA genome. *Nucleic Acids Res* 33:796-804.
- [4] Shen LX, Basilion JP, Stanton VP. 1999. Single-nucleotide polymorphisms can cause different structural folds of mRNA. *Proc Natl Acad Sci U S A*, 96:7871-7876.
- [5] Teresi RE, Zbuk KM, Pezzolesi MG, Waite KA, Eng C. 2007. Cowden syndrome-affected patients with PTEN promoter mutations demonstrate abnormal protein translation. *Am J Hum Genet*, 81:756-767.
- [6] van Hemert FJ, Zaaier HL, Berkhout B, Lukashov VV. 2008. Occult hepatitis B infection: an evolutionary scenario. *Virology J* 5:146.
- [7] Chen GL, Vallender EJ, Miller GM. 2008. Functional characterization of the human TPH2 5' regulatory region: untranslated region and polymorphisms modulate gene expression in vitro. *Hum Genet* 122:645-657.
- [8] Carpen JD, Archer SN, Skene DJ, Smits M, von Schantz M. 2005. A single-nucleotide polymorphism in the 5'-untranslated region of the hPER2 gene is associated with diurnal preference. *J Sleep Res* 14:293-297.
- [9] Song C, Chen LZ, Zhang RH, Yu XJ, Zeng YX. 2006. Functional variant in the 3'-untranslated region of Toll-like receptor 4 is associated with nasopharyngeal carcinoma risk. *Cancer Biol Ther*, 5:1285-1291.
- [10] Nury D, Chabanon H, Levadoux-Martin M, Hesketh J.. 2005. An eleven nucleotide section of the 3'-untranslated region is required for perinuclear localization of rat metallothionein-1 mRNA. *Biochem J* 387:419-428.
- [11] Piri N, Gao YQ, Danciger M, Mendoza E, Fishman GA, Farber DB. 2005. A substitution of G to C in the cone cGMP-phosphodiesterase gamma subunit gene found in a distinctive form of cone dystrophy. *Ophthalmology*, 112:159-166.
- [12] Reamon-Buettner SM, Cho SH, Borlak J. 2007. Mutations in the 3'-untranslated region of GATA4 as molecular hotspots for congenital heart disease (CHD). *BMC Med Genet* 8:38.
- [13] Hill MJ, Reynolds GP. 2011. Functional consequences of two HTR2C polymorphisms associated with antipsychotic-induced weight gain. *Pharmacogenomics*, 12:727-734.
- [14] Siala O, Salem IH, Tlili A, Ammar I, Belguith H, Fakhfakh F. 2010. Novel sequence variations in LAMA2 and SGCG genes modulating cis-acting regulatory elements and RNA secondary structure. *Genet Mol Bio* 33:190-197.
- [15] Tsao D, Shabalina SA, Gauthier J, Dokholyan NV, Diatchenko L. 2011. Disruptive mRNA folding increases translational efficiency of catechol-O-methyltransferase variant. *Nucleic Acids Res* 39:6201-6212.

- [16] Boffa MB, Maret D, Hamill JD, Bastajian N, Crainich P, Jenny NS, Tang Z, Macy EM, Tracy RP, Franco RF, Nesheim ME, Koschinsky ML. 2008. Effect of single nucleotide polymorphisms on expression of the gene encoding thrombin-activatable fibrinolysis inhibitor: a functional analysis. *Blood*, 111:183-189.
- [17] Thiel CT, Horn D, Zabel B, Ekici AB, Salinas K, Gebhart E, Rschendorf F, Sticht H, Spranger J, Mller D, Zweier C, Schmitt ME, Reis A, Rauch A. 2005. Severely incapacitating mutations in patients with extreme short stature identify RNA-processing endoribonuclease RMRP as an essential cell growth regulator. *Am J Hum Genet* 77:795-806.
- [18] Venturin M, Moncini S, Villa V, Russo S, Bonati MT, Larizza L, Riva P. 2006. Mutations and novel polymorphisms in coding regions and UTRs of CDK5R1 and OMG genes in patients with non-syndromic mental retardation. *Neurogenetics*, 7:59-66.
- [19] Tang S, Collier AJ, Elliott RM. 1999. Alterations to both the primary and predicted secondary structure of stem-loop IIIc of the hepatitis C virus 1b 5' untranslated region (5'UTR) lead to mutants severely defective in translation which cannot be complemented in trans by the wild-type 5'UTR sequence. *J Virol* 73:2359-2364.
- [20] Camaschella C, Zecchina G, Lockitch G, Roetto A, Campanella A, Arosio P, Levi S. 2000. A new mutation (G51C) in the iron-responsive element (IRE) of L-ferritin associated with hyperferritinaemia-cataract syndrome decreases the binding affinity of the mutated IRE for iron-regulatory proteins. *Br J Haematol* 108:480-482.
- [21] Griseri P, Lantieri F, Puppo F, Bachetti T, Di Duca M, Ravazzolo R, Ceccherini I. 2007 A common variant located in the 3'UTR of the RET gene is associated with protection from Hirschsprung disease. *Hum Mutat* 28:168-76.
- [22] Tang Z, Diamond MA, Chen JM, Holly TA, Bonow RO, Dasgupta A, Hyslop T, Purzycki A, Wagner J, McNamara DM, Kukulski T, Wos S, Velazquez EJ, Ardlie K, Feldman AM. 2007. Polymorphisms in adenosine receptor genes are associated with infarct size in patients with ischemic cardiomyopathy. *Clin Pharmacol Ther* 82:435-440.
- [23] Vallender EJ, Priddy CM, Hakim S, Yang H, Chen GL, Miller GM. 2008. Functional variation in the 3' untranslated region of the serotonin transporter in human and rhesus macaque. *Genes Brain Behav* 7:690-697.
- [24] Capasso M, Ayala F, Russo R, Avvisati RA, Asci R, Iolascon A. 2009. A predicted functional single-nucleotide polymorphism of bone morphogenetic protein-4 gene affects mrna expression and shows a significant association with cutaneous melanoma in southern italian population. *J Cancer Res Clin Oncol* 135:1799-1807.
